## **Ancestry and Genetic Associations with Bronchopulmonary Dysplasia in Preterm Infants**

Dara G. Torgerson<sup>1</sup>, Philip L. Ballard<sup>1</sup>, Roberta L. Keller<sup>1</sup>, Sam S. Oh<sup>2</sup>, Scott Huntsman<sup>2</sup>, Donglei Hu<sup>2</sup>, Celeste Eng<sup>2</sup>, Esteban G. Burchard<sup>2,3</sup>, Roberta A. Ballard<sup>1</sup> and the TOLSURF Study Group\*

\*See Appendix for complete list of TOLSURF Study Investigators and their affiliations

<sup>1</sup>Department of Pediatrics, University of California, San Francisco, San Francisco, CA.

<sup>2</sup>Department of Medicine, University of California, San Francisco, San Francisco, CA.

<sup>3</sup>Department of Bioengineering and Therapeutic Sciences, University of California, San Francisco, San Francisco, CA.

1 **ABSTRACT**

2

3 Bronchopulmonary dysplasia in premature infants is a common and often severe lung disease  
4 with long term sequelae. A genetic component is suspected but not fully defined. We performed  
5 an ancestry and genome-wide association study to identify variants, genes and pathways  
6 associated with survival without bronchopulmonary dysplasia in 387 high-risk infants treated  
7 with inhaled nitric oxide in the Trial of Late Surfactant study. Global African genetic ancestry  
8 was associated with increased survival without bronchopulmonary dysplasia among infants of  
9 maternal self-reported Hispanic White race/ethnicity (OR=4.5, p=0.01). Admixture mapping  
10 found suggestive outcome associations with local African ancestry at 18q21 and 10q22 among  
11 infants of maternal self-reported African American race/ethnicity. For all infants, the top  
12 individual variant identified was within the intron of *NBL1*, which is expressed in mid-trimester  
13 lung and is an antagonist of bone morphogenetic proteins (rs372271081, OR=0.17, p=7.4x10<sup>-7</sup>).  
14 The protective allele of this variant was significantly associated with lower nitric oxide  
15 metabolites in the urine of non-Hispanic white infants (p= 0.006), supporting a role in the racial  
16 differential response to nitric oxide. Interrogating genes upregulated in bronchopulmonary  
17 dysplasia lungs indicated association with variants in *CCL18*, a cytokine associated with fibrosis  
18 and interstitial lung disease, and pathway analyses implicated variation in genes involved in  
19 immune/inflammatory processes in response to infection and mechanical ventilation. Our results  
20 suggest that genetic variation related to lung development, drug metabolism, and immune  
21 response contribute to individual and racial/ethnic differences in respiratory outcomes following  
22 inhaled nitric oxide treatment of high-risk premature infants.

23

## 24 INTRODUCTION

25

26 Bronchopulmonary dysplasia (BPD) of premature infants is currently characterized by  
27 continuing requirement for supplemental oxygen and/or respiratory support at 36 weeks post  
28 menstrual age (PMA). BPD is the most common form of chronic lung disease in infants born  
29 prematurely and is associated with long-term respiratory morbidity, neurodevelopmental  
30 abnormalities, and death (35). The pathogenesis of BPD includes lung immaturity, with reduced  
31 pulmonary surfactant and low antioxidant and immune defenses, plus exposure to insults of  
32 hyperoxia, barotrauma from ventilator support, and infections that damage lung epithelium and  
33 elicit inflammation. Sequelae of this injury are arrested lung development, fibrosis and altered  
34 airway reactivity (7, 19, 24, 33, 35, 38, 47).

35 Therapeutic options for the prevention and treatment of BPD are limited and have not  
36 substantially affected the incidence of disease (reviewed in (26, 28)). For example, vitamin A  
37 treatment evokes a modest reduction of BPD but is not in general use, and caffeine reduces  
38 oxygen use and is routinely used for prevention of apnea. Postnatal dexamethasone therapy  
39 improves respiratory status acutely and decreases the incidence of BPD. However, longer  
40 courses of this therapy are associated with neurodevelopmental abnormalities. Inhaled nitric  
41 oxide (iNO) is used off-label in preterm infants to prevent BPD, however, the general efficacy of  
42 the drug has been brought into question (20).

43 The majority of studies evaluating the effectiveness of iNO have been performed in  
44 individuals with predominantly European ancestry (6). However, in the entire cohort of the Trial  
45 of Late Surfactant (TOLSURF) (60), and in a recent individual participant data meta-analysis  
46 across selected iNO trials (5), the incidence of BPD was significantly lower following treatment

47 with iNO in infants of mothers who self-report as Black/African American ethnicity as compared  
48 to those who self-report as non-Hispanic White. Coupled to observed differences in levels of  
49 urinary NO metabolites in Black/African American vs. non-Hispanic White infants (8), these  
50 results suggest that response to iNO in terms of preventing BPD varies between racial/ethnic  
51 groups.

52 Although both the intrauterine and postnatal environment play an important role in BPD,  
53 twin studies have estimated the heritability between 50-80% (14, 39), suggesting a genetic  
54 contribution as well (29). Genetic studies of BPD have identified several candidate genes and  
55 pathways through genome-wide association studies (GWAS) (4, 29, 61) and exome sequencing  
56 (18, 40). However, none of the associations identified through GWAS have reached genome-  
57 wide significance, and replication of genetic associations has been problematic. This may in part  
58 be due to low statistical power given the relatively small sample size of each study (<1000  
59 preterm infants), combined with the absence of a single genetic risk factor of large effect.  
60 Similarly, disease heterogeneity, including the potential for differences in the genetic  
61 architecture of BPD between racial/ethnic groups, and the specific definition of BPD used, may  
62 reduce statistical power. (4) However, pathway and gene-set enrichment analyses have identified  
63 candidates with high biological plausibility. (4, 40)

64 In this study, we performed a GWAS for survival without BPD in preterm infants in  
65 TOLSURF, which included infants of maternal self-reported African American, Hispanic, and  
66 non-Hispanic white race/ethnicity who all received iNO. We examine the effects of genetic  
67 variation at the level of individual variants, genes, and genetic pathways, and test the hypothesis  
68 that genetic ancestry at both the genomic and local scale is associated with survival without BPD  
69 in admixed populations.

70 **METHODS**

71 ***Study approval.***

72 Patient recruitment for the TOLSURF study was approved by the Institutional Review Boards at  
73 all participating sites including the University of California San Francisco.

74

75 ***Study Subjects.***

76 TOLSURF was a masked, randomized, sham-controlled trial conducted in 25 US hospitals  
77 ([ClinicalTrials.gov](https://clinicaltrials.gov): NCT01022580). The study was designed to assess the effect of late doses of  
78 surfactant on BPD at 36 wk post menstrual age (PMA) in infants of 23-28 wk gestation who  
79 required intubation and mechanical ventilation between 7 and 14 days of age (9). A total of 511  
80 infants were enrolled, and all received iNO (Ikaria, Hampton, New Jersey) according to the  
81 protocol followed in the NO CLD trial (10). BPD was assessed at 36 wk PMA by physiologic  
82 testing as described (10). There was no statistical difference in BPD incidence between control  
83 and surfactant-treated groups at 36 wk and the two groups were combined for this genetic study.  
84 Some infants were co-enrolled in the multi-center, observational Prematurity and Respiratory  
85 Outcomes Project (PROP) (52).

86 ***Genotyping and Quality Control.***

87 DNA was extracted from tracheal aspirate cells from 454 infants whose parents consented for  
88 DNA collection using cells from up to five tracheal aspirate collections per patient. DNA was  
89 isolated using an AutoGeneprep 965 instrument (Autogen, Holliston, MA) by the manufacturer's  
90 recommended standard protocol for human body fluids. In some cases, where protein  
91 contamination was evident, DNA was re-precipitated using 3 volumes of 100% Ethanol and 3M  
92 Ammonium acetate at a 3:1 ratio after incubation at -80°C overnight. Samples were initially

93 quantified by Nanodrop (ThermoFisher Scientific, Inc., Waltman MA) to access purity  
94 (A260/280) followed by analysis using the Agilent 2100 Bioanalyzer (Agilent, Santa Clara, CA)  
95 to more accurately access DNA quantity. The range of values for DNA concentration (ng/ul)  
96 ranged from 10-1750, median 130; total DNA/patient (ng) 130-4200, median 1600; A260/280  
97 1.32-1.91, median 1.77; 429 samples were of suitable quality and quantity for genotyping.

98 Genotyping was performed on the Affymetrix Axiom LAT1 array (WorldArray 4) that  
99 contained >800,000 single nucleotide polymorphisms (SNPs) prior to quality control. SNPs were  
100 filtered based on call rates < 95%, and Hardy-Weinberg equilibrium p-values <10<sup>-6</sup> using PLINK  
101 (53). Subjects were evaluated for call rates, consistency between genetic and reported sex,  
102 autosomal heterozygosity, and cryptic relatedness/genetic identity using IBD/IBS estimates in  
103 PLINK (53). In the case of multiples, one individual was selected at random to be included in the  
104 study.

105

### 106 ***Statistical Analysis.***

107 Genomic levels of African ancestry were evaluated using ADMIXTURE (3) in a quasi-  
108 supervised analysis assuming three ancestral continental populations of origin (K=3, African,  
109 European, and Native American). Windows were offset by a factor of 0.2, the cutoff for linkage  
110 was set to 0.1, and a constant recombination rate was set to 10<sup>-8</sup> (bp)<sup>-1</sup>. The proportion of global  
111 African ancestry was compared between cases (BPD/death) vs. controls (survival without BPD)  
112 using logistic regression within infants with maternal self-reported African American ancestry  
113 and Hispanic ethnicity, adjusting for gestational age, sex, birth weight, and multiple gestation  
114 (yes/no). Local ancestry was inferred using LAMP-LD (11) in infants with maternal self-  
115 reported African American race/ethnicity using a two-population model. Unrelated CEU and

116 YRI individuals from the HapMap were used as a reference to estimate global and local African  
117 ancestry.

118 Imputation of genetic variation from the phase 3 Thousand Genomes Project was  
119 performed using the Michigan Imputation Server (32), including ~ 79 million variants. Variants  
120 were then filtered for imputation quality scores  $> 0.3$ . Genetic association testing for survival  
121 without BPD was performed at both genotyped and imputed SNPs using logistic regression,  
122 adjusting for global genetic ancestry, gestational age, sex, birth weight, and multiple gestation.  
123 Analyses were performed within each racial/ethnic group using PLINK (53), then combined in a  
124 meta-analysis using METAL (64). Gene-based statistics were calculated using VEGAS (42)  
125 using genotyped SNPs, and intersected with a set of genes previously identified as being  
126 upregulated in BPD-dysregulated lungs (15). Pathway and gene-set analyses were performed  
127 using canonical pathways in IPA (Ingenuity Pathway Analysis (31)), and PANTHER (46) and  
128 MSigDB (56) using GREAT version 3.0.0 (45). Using GREAT, we assigned a foreground of  
129 gene coordinates with an association  $p > 0.05$  for survival without BPD, and a background of all  
130 gene coordinates for which a gene-based statistic was calculated (from VEGAS (42)).

131 Admixture mapping for local African ancestry was performed in infants with maternal  
132 self-reported African American race/ethnicity using logistic regression. Similar to association  
133 testing on individual variants, we performed association testing for the number of haplotypes of  
134 African ancestry at each genotyped SNP (homologous to association testing for the number of  
135 copies of the minor allele). Identical to our GWAS, we adjusted for global genetic ancestry,  
136 gestational age, sex, birth weight, and multiple gestation.

137 Measures of NO metabolites (NO<sub>x</sub>) including nitrate, nitrite, and nitrosylated compounds  
138 were made from the urine of 62 infants included in the current genetic study both before and

139 following administration of iNO at 2-20 ppm as previously described (8). Briefly, urine was  
140 collected for 4-8 hours, and NO<sub>x</sub> were assayed according to (50) and normalized to creatinine to  
141 adjust for renal excretory function. NO<sub>x</sub> were measured at 3 different doses of iNO, including 2,  
142 5, and 10-20 ppm. Genetic association testing at a single SNP was performed using linear  
143 regression to test for a correlation between genotype and values of NO<sub>x</sub> at a dose of 5  
144 ppm. Values of NO<sub>x</sub> at 5ppm were selected for analysis because they are highly correlated to  
145 levels at 2 ppm, and more closely resemble a normal distribution as compared to 10-20 ppm.

146 For selected genes of interest, mRNA expression levels were obtained from a previous  
147 study that performed RNAseq on 3 specimens of human fetal lung of 23 wk gestational age  
148 (Gene Expression Omnibus, accession number GSE83888) (12).

149

150

## 151 **RESULTS**

152

153 Following quality control, our study included a total of 795,465 genotyped SNPs and 387  
154 unrelated infants; demographics by respiratory outcome is shown in Table 1 for 271 infants who  
155 died or had a diagnosis of BPD and 116 survivors without BPD. Overall, mean values for  
156 gestational age and birth weight were approximately 25 wk and 700 g, respectively, for this  
157 group of infants who still required intubation and ventilation between 7 and 14 days of age,  
158 representing a cohort at high risk for BPD. Within infants of maternal self-reported non-Hispanic  
159 white ethnicity (White), infants with BPD/death had a significantly higher respiratory severity  
160 score (RSS) upon study entry as compared to survivors without BPD, but had no significant  
161 difference in gestational age, birth weight, sex, and multiple gestations. Within infants of



162 maternal self-reported Black/African American ethnicity (Black/AA), infants with BPD/death  
163 had significantly lower gestational age, lower birth weight, and higher RSS as compared to No  
164 BPD. These differences for infants with/without BPD are consistent with the known influence of  
165 immaturity and severity of early lung disease on BPD. No significant differences in clinical  
166 characteristics were observed between the two groups of maternal self-reported White Hispanic  
167 ethnicity (White Hispanic).

168

### 169 ***Global Ancestry and Admixture Mapping.***

170 Individual proportions of genomic African ancestry were consistent with expectations  
171 given maternal self-reported race/ethnicity (Fig. 1, A and B). Specifically, Black/AA infants had  
172 a higher degree of African ancestry (median=85% [range=40-100%]) as compared to White  
173 Hispanic infants (median=6.3% [range=1.2-63%]).

174 Global African ancestry was not significantly different between infants with BPD/death  
175 as compared to those surviving without BPD in Black/AA infants (beta=-0.015, se=0.37, p=0.97)  
176 (Fig. 1C). However, African ancestry was protective for BPD/death in White Hispanic infants  
177 (beta=-1.5, se=0.6, p=0.01) (Fig. 1D). Results were similar when all covariates were excluded.  
178 African ancestry was further compared at individual loci in Black/AA infants using logistic  
179 regression (i.e. local ancestry, or admixture mapping), and top associations were observed at  
180 10q21 where African ancestry was protective for BPD/death ( $p=4.4 \times 10^{-4}$ , OR=0.17) and 18q21  
181 where African ancestry was risky for BPD/death ( $p=2.7 \times 10^{-4}$ , OR=4.6) (Fig. 2). The estimated  
182 number of independent ancestry blocks was determined to be 478, and thus neither of the  
183 admixture mapping peaks was statistically significant following Bonferroni correction  
184 ( $\alpha=1.0 \times 10^{-4}$ ).

185

186 ***Genome-Wide Association Study (GWAS) and Gene-based Comparisons.***

187

188         Following genotype imputation, we tested the entire cohort for an association with  
189 survival without BPD at 8.8 million individual variants, adjusting for global genetic ancestry,  
190 gestational age, sex, birth weight, and multiple gestations. No individual variant was genome-  
191 wide significantly associated with BPD (all p-values  $> 5 \times 10^{-8}$ , Fig. 3). However, the top  
192 association was observed at a variant within the intron of *NBLI* (rs372271081,  $p=7.4 \times 10^{-7}$ ) (Fig.  
193 4A). The minor allele was protective for BPD (OR=0.17), and showed a similar effect within  
194 each racial/ethnic group (Table 2). *NBLI* and two additional genes within the same region  
195 (*CAPZB* and *MINOS1*) were expressed in fetal lung at 23 wk gestation (Fig. 4B). Furthermore,  
196 the minor allele at rs372271081 was significantly associated with decreased urinary NO<sub>x</sub> in  
197 White infants, but was not significant in Black/AA or White Hispanic infants (Table 3, Fig. 5A).  
198 Notably, the protective allele for BPD at rs372271081 is at a somewhat higher frequency in  
199 populations with African ancestry (Fig. 5B).

200         To increase statistical power, we combined the results of association testing of individual  
201 variants within known genes to create a single gene-based statistic. No individual gene was  
202 significantly associated with BPD following Bonferroni correction for 17,670 tests (the number  
203 of genes tested,  $\alpha=2.8 \times 10^{-6}$ ) (Table 4). However, by restricting our comparisons to 21  
204 candidate genes whose expression is dysregulated in BPD lungs, variation in *CCL18* was  
205 significantly associated with BPD ( $p=0.0011$ ). This gene is expressed at a low level in 23-wk  
206 human fetal lung ( $0.31 \pm 0.10$  cpm). None of the genes implicated from Li et al. (40) were  
207 significantly associated with BPD (minimum  $p=0.0018$ , *ADCY8*), nor were 11 NO-related

208 candidate genes (Table 5) with reported associations to human disease (minimum  $p=0.18$ ,  
209 *KALRN*).

210

### 211 ***Pathway Analysis.***

212 Pathway analysis can be a powerful means to identify an enrichment of genes with  
213 marginal signals of association on their own, but which function in a similar biological pathway.  
214 Pathway analysis was performed using GREAT (45) on 1,024 genes with gene-based  $p$ -values  $<$   
215 0.05 as compared to 17,640 genes as a background. A total of five pathways/gene sets were  
216 identified with a false discovery rate (FDR)  $<$  0.05 from the Panther and MSigDB databases; this  
217 group contains two pathways related to cancers, one related to immune function, one related to  
218 methylation marks, and one implicated in experimental lung injury (Table 6). The pathway of  
219 highest statistical significance ( $p=5 \times 10^{-12}$ ) was "Genes within amplicon 1q21 identified in a copy  
220 number alterations study of 191 breast tumor samples". Eight of the 11 genes in this pathway are  
221 expressed in human fetal lung at 23 wk GA, and none are regulated by glucocorticoids, which  
222 enhance fetal lung maturity. Biological functions of potential relevance to lung development,  
223 injury, and repair for these genes include tyrosine kinase receptor signaling pathway (EFNA4,  
224 RUSC1, SHC1, ADAM15), developmental processes (EFNA4, RUSC1, ZBTB7B, PBXIP1,  
225 SHC1, ADAM15, PYGO2) including angiogenesis (SHC1), NF-kappaB signaling (RUSC1,  
226 ZBTB7B), and sex steroid receptor signaling (PBXIP1, SHC1).

227 Pathway analysis using Ingenuity Pathway Analysis (IPA) of 181 genes with gene-based  
228  $p$ -values  $<$  0.01 of 209 canonical pathways identified two with a significant enrichment of genes  
229 following a Bonferroni correction: agranulocyte adhesion and diapedesis ( $p=3.06 \times 10^{-5}$ ) and  
230 granulocyte adhesion and diapedesis ( $p=1.22 \times 10^{-4}$ ); genes in these two pathways are identical

231 except for *MYL9* (Table 7). With the exception of *CLDN17*, all genes identified in these  
232 pathways are expressed in human fetal lung (12).

233

234

235

## 236 **DISCUSSION**

237

238 Unique aspects of our study are the patient population and rigorous assignment of BPD.

239 All infants in TOLSURF were <28 wk gestation and were intubated at 7-14 days, representing

240 infants with severe early respiratory failure and high risk for BPD as reflected by the occurrence

241 of BPD/death in 68.5% of the total population (9). In addition, infants were enrolled from 25

242 different U.S. sites, providing both racial/ethnic and geographic diversity. The diagnosis of BPD

243 was assigned on a physiologic basis using an oxygen/flow reduction challenge to establish a

244 requirement for respiratory support. Thus, it is possible that some of our findings may be

245 restricted to extremely premature infants with severe early respiratory disease. Other unique

246 characteristics of our cohort are exposure to late surfactant treatment in approximately half of the

247 infants, and the use of iNO for 3 wk in all infants. Although surfactant therapy transiently

248 improved respiratory status it did not affect outcome at 36 wk PMA. iNO therapy likely

249 influenced outcome in African American infants, but not Caucasians, and thus we examined NO

250 metabolism as it relates to genetic associations with BPD in our study.

251 Higher genomic levels of African ancestry were associated with better respiratory

252 outcome in iNO-treated infants with maternal self-reported Hispanic White race/ethnicity but not

253 for infants with maternal self-reported Black/African American race/ethnicity. While the

254 protective effect of African genomic ancestry in White Hispanic infants requires independent  
255 replication, our results suggest that a protective effect of African ancestry may be saturated at  
256 lower levels of ancestry than is present in the majority of Black/African American infants in the  
257 study, or may reflect the presence of differential gene-environment interactions. Specifically, in  
258 White Hispanic infants, the proportion of African ancestry ranged from 1.2-63% (median of  
259 6.3%) as compared to 40-100% (median of 85%) in Black/African American infants.

260 Genetic ancestry does not form a direct causal relationship, but rather indicates  
261 differences in the underlying patterns of genetic variation in infants with/without BPD that differ  
262 by continental origin. If only small proportions of African ancestry are required for a protective  
263 effect, this would suggest a highly polygenic contribution to BPD distributed throughout the  
264 genome. Admixture mapping in Black/AA infants identified two suggestive, but not statistically  
265 significant peaks, at 10q22 and 18q21, whereby African ancestry was associated with both a  
266 decreased and increased risk of death/BPD, respectively. Therefore, admixture mapping further  
267 supports the hypothesis that the effect of ancestry is not limited to a single locus of large effect.  
268 It is possible the relationship between ancestry and BPD is restricted to infants receiving iNO,  
269 given that the incidence of BPD in many studies doesn't vary between racial/ethnic groups in  
270 untreated infants (13); furthermore, prior studies have identified racial differences in endogenous  
271 NO levels or metabolism in infants (8) and adults (34, 36, 37, 44).

272 In our agnostic scan including ~9 million genotyped and imputed variants, no individual  
273 variant was genome-wide significantly associated with survival without BPD. This was not  
274 unexpected given our small sample size, and is consistent with prior GWAS that similarly failed  
275 to identify individual variants with large effects (4, 29, 61). Modest sample size is a limitation  
276 common to genetic studies of preterm infants, and thus there is a need to integrate additional

277 biological measurements. Along this line, our top BPD-associated variant, rs372271081, was  
278 significantly associated with differences in NO<sub>x</sub> in White infants, whereby the protective allele  
279 for BPD was associated with decreased levels of NO<sub>x</sub> in the urine following treatment of iNO.  
280 However, we found no significant association between genotype and NO metabolites in  
281 Black/AA or Hispanic White infants, which may reflect the limited statistical power given the  
282 smaller sample sizes, the lower frequency of the allele, varying patterns of linkage  
283 disequilibrium, and/or the presence of genetic and environmental interactions.

284         Rs372271081 lies within an intron of Neuroblastoma 1, DAN Family BMP Antagonist  
285 (*NBLI*), which is a highly plausible candidate gene for contributing to BPD susceptibility via  
286 differential response to iNO. Numerous studies in mice indicate that the BMP pathway is  
287 important for lung development, including branching morphogenesis in early gestation and distal  
288 lung epithelial cell differentiation, alveolization and vasculogenesis in late gestation (17, 23, 62).  
289 The TGF- $\beta$ /BMP signaling pathway is disrupted by hyperoxia (1), which is known to play a role  
290 in the development of BPD (1, 2). In humans, disrupted BMP signaling has been implicated in  
291 the pathogenesis of heritable pulmonary arterial hypertension and hereditary hemorrhagic  
292 telangiectasis (27, 48). Lastly, in addition to ligand inhibition of BMP, DAN family members are  
293 known to modulate wnt and VEGF signaling pathways that have a role in lung development and  
294 injury/repair (48). Overall, there is strong biological plausibility for a role of genetic variation in  
295 *NBLI* and respiratory outcome in iNO-treated infants based on 1) the critical role of BMP  
296 signaling in lung development and disease, 2) the mediation of BMP action via NO, 3) the  
297 expression of *NBLI* and BMPs in human fetal lung (35), and 4) the racial differences in BPD and  
298 NO metabolism (12).

299           Although *NBLI* has not been specifically implicated in prior GWAS/exome sequencing  
300 studies, genes involved in lung development are strong candidates for a role in BPD, which only  
301 occurs in immature lungs. For example, a common variant in *SPOCK2*, an extracellular matrix  
302 protein, was implicated in BPD through GWAS and found to be upregulated during lung alveolar  
303 development and after exposure to hyperoxia in rats (29). Furthermore, pathway analyses have  
304 implicated other genes involved in pulmonary structure and functions (40). Replication and both  
305 laboratory and functional validation are necessary to confirm a causal relationship of variants in  
306 *NBLI* and BPD in infants treated with iNO. Currently there are no other cohorts of premature  
307 infants treated with iNO with DNA samples available for validation studies.

308           We further performed hypothesis-driven tests of association with BPD using a set of 21  
309 genes that are dysregulated in BPD lungs (15), and 11 genes in the nitric oxide pathway that are  
310 reported to have variants associated with disease (Table 5). First, we hypothesized that genes  
311 showing differential expression in BPD-dysregulated vs. control lungs may contain variants that  
312 contribute to survival without BPD. We found a significant association with genetic variation in  
313 a single gene - *CCL18*, a cytokine involved in the immune response that promotes collagen  
314 production in lung fibroblasts (43) and is associated with pulmonary fibrosis and interstitial lung  
315 diseases in adults (51, 66). Inflammation is known to be important in the pathogenesis of BPD,  
316 and anti-inflammatory therapy (dexamethasone) suppresses a variety of inflammatory mediators,  
317 including CCL18, and reduces BPD (12, 26). Second, because all infants in the study received  
318 iNO, we hypothesized that variation in genes in the NO pathway may contribute to differential  
319 response to iNO treatment as indicated by survival without BPD. Yet, no individual variant or  
320 candidate gene (based on known association with human disease) was significantly associated  
321 with survival without BPD following correction for multiple tests.

322           However, because differences in rates of BPD between racial/ethnic groups may be  
323 exclusively observed in infants treated with iNO (5, 60), we hypothesized that genetic variants  
324 that contribute to BPD may act through differential response to iNO. In support of this, the  
325 protective allele for BPD at rs372271081 is significantly associated with decreased NO<sub>x</sub> and is  
326 more common in populations with African ancestry. Several studies indicate reduced  
327 bioavailability of NO in African Americans vs Caucasians, likely in part due to increased  
328 oxidation of NO. In laboratory studies, release of NO from umbilical venous endothelial cells  
329 was substantially lower in African American vs Caucasian infants (36, 44). Levels of urinary  
330 NO<sub>x</sub> are lower in African American and Hispanic premature infants vs Caucasian infants  
331 regardless of iNO treatment, reflecting baseline differences in NO metabolism and thus  
332 bioavailability (8). In adults, African Americans are known to have increased frequency of  
333 hypertension and cardiovascular disease, and a NO-targeted medication (isosorbide dinitrates  
334 and hydralazine) is indicated therapy for heart failure specifically in African Americans (i.e., a  
335 racially directed therapy) (34, 37). However, further studies are needed to evaluate the  
336 contribution of rs372271081 to racial/ethnic differences in NO bioavailability and differential  
337 response to iNO.

338           Pathway analyses identified pathways and sets of genes that were significantly enriched  
339 for genes with association p-values < 0.05. Across IPA, Panther, and MSigDB datasets, a  
340 common theme that emerged was genes involved in immune function, including granulocyte and  
341 agranulocyte adhesion and diapedesis from IPA canonical pathways, toll receptor signaling  
342 pathway from Panther, and genes upregulated in response to LPS exposure and mechanical  
343 ventilation from MSigDB. These results suggest that variation in immune response, including  
344 recruitment of leukocytes and lymphocytes, contributes to survival without BPD.



345 Overall, our results for this cohort of iNO-treated, high-risk infants suggest that genomic  
346 African ancestry is protective for BPD, and that an intronic variant in *NBLI* may contribute to  
347 BPD via differential activity of the TGF- $\beta$ /BMP pathway and production/metabolism of NO.  
348 Furthermore, we implicated variation in genes involved in the immune response, including  
349 *CCL18*, as contributing to differences in respiratory outcomes of preterm infants.

350

### 351 **GRANTS**

352

353 This study was funded by grants from the National Health, Lung, and Blood Institute (NHLBI,  
354 5U01HL094338M, 1R01MD010443, R21ES24844, R01HL117004, U54MD009523,  
355 R01HL128439, **U01 HL101798**), and an Edward A. Dickson Emeritus Professorship Award  
356 (PLB). Ikaria Inc./ Mallinckrodt Pharmaceuticals funded the genetic analyses, including support  
357 for supplies, technical effort and statistical analyses. In addition, Ikaria Inc. and ONY Inc.  
358 provided drug for the conduct of the parent trial, but neither company had input into study  
359 design, data analysis, data interpretation or manuscript preparation.

360

### 361 **DISCLOSURES**

362 No conflicts of interest, financial or otherwise, are declared by the authors.

363

### 364 **AUTHOR CONTRIBUTIONS**

365 D.G.T., P.L.B., R.L.K. E.G.B. and R.A.B. conceived and designed research; P.L.B., R.L.K.,  
366 C.E., E.G.B., and R.A.B. performed experiments; D.G.T., P.L.B., R.L.K., S.S.O., S.H., D.H.,  
367 C.E., and R.A.B. analyzed data; D.G.T, P.L.B., R.L.K., and R.A.B. interpreted results of

368 experiments; D.G.T. prepared figures; D.G.T. and P.L.B. drafted manuscript; D.G.T., P.L.B.,  
369 R.L.K., E.G.B. and R.A.B. edited and revised manuscript; D.G.T., P.L.B., R.L.K., S.S.O., S.H.,  
370 D.H., C.E., and R.A.B. approved final version of manuscript.

371

## 372 **ACKNOWLEDGMENTS**

373 We thank the TOLSURF Investigators, study coordinators, physicians, nurses, respiratory  
374 therapists and the families who participated in the TOLSURF study.

375

## 376 **AUTHOR NOTES**

377 Address for reprint requests and other correspondence: Dara G. Torgerson, University of  
378 California San Francisco, MC 2530, 1700 4<sup>th</sup> Street, San Francisco CA 94143 (e-mail:  
379 [dara.torgerson@me.com](mailto:dara.torgerson@me.com)).

380

381 **REFERENCES**

- 382 1. Alejandro-Alcázar, M. A., G. Kwapiszewska, I. Reiss, O. V. Amarie, L. M. Marsh, J.  
383 Sevilla-Pérez, M. Wygrecka, B. Eul, S. Köbrich, M. Hesse, R. T. Schermuly, W. Seeger, O.  
384 Eickelberg, and R. E. Morty. Hyperoxia modulates TGF-beta/BMP signaling in a mouse  
385 model of bronchopulmonary dysplasia. *Am J Physiol Lung Cell Mol Physiol*  
386 2007;292:L537-49.
- 387 2. Alejandro-Alcázar, M. A., P. D. Shalamanov, O. V. Amarie, J. Sevilla-Pérez, W. Seeger,  
388 O. Eickelberg, and R. E. Morty. Temporal and spatial regulation of bone morphogenetic  
389 protein signaling in late lung development. *Dev Dyn* 2007;236:2825-2835.
- 390 3. Alexander, D. H., J. Novembre, and K. Lange. Fast model-based estimation of ancestry in  
391 unrelated individuals. *Genome Res* 2009;19:1655-1664.
- 392 4. Ambalavanan, N., C. M. Cotten, G. P. Page, W. A. Carlo, J. C. Murray, S. Bhattacharya, T.  
393 J. Mariani, A. C. Cuna, O. M. Faye-Petersen, D. Kelly, R. D. Higgins, and Genomics and  
394 Cytokine Subcommittees of the Eunice Kennedy Shriver National Institute of Child Health  
395 and Human Development Neonatal Research Network. Integrated genomic analyses in  
396 bronchopulmonary dysplasia. *J Pediatr* 2015;166:531-7.e13.
- 397 5. Askie LM, D. L. C., Schreiber MD, Hibbs AM, Ballard PL, Ballard RA. Race effects of  
398 Inhaled Nitric Oxide in Preterm Infants (RiNOP): an individual participant data meta-  
399 analysis. *J Pediatr*. 2017 Dec 11. pii: S0022-3476(17)31345-8. doi:  
400 10.1016/j.jpeds.2017.10.004. [Epub ahead of print]
- 401 6. Askie, L. M., R. A. Ballard, G. R. Cutter, C. Dani, D. Elbourne, D. Field, J. M. Hascoet, A.  
402 M. Hibbs, J. P. Kinsella, J. C. Mercier, W. Rich, M. D. Schreiber, P. S. Wongsiridej, N. V.  
403 Subhedar, K. P. Van Meurs, M. Voysey, K. Barrington, R. A. Ehrenkranz, N. N. Finer, and

- 404 Meta-analysis of Preterm Patients on Inhaled Nitric Oxide Collaboration. Inhaled nitric  
405 oxide in preterm infants: an individual-patient data meta-analysis of randomized trials.  
406 *Pediatrics* 2011;128:729-739.
- 407 7. Balinotti, J. E., V. C. Chakr, C. Tiller, R. Kimmel, C. Coates, J. Kisling, Z. Yu, J. Nguyen,  
408 and R. S. Tepper. Growth of lung parenchyma in infants and toddlers with chronic lung  
409 disease of infancy. *Am J Respir Crit Care Med* 2010;181:1093-1097.
- 410 8. Ballard, P. L., R. L. Keller, D. M. Black, D. J. Durand, J. D. Merrill, E. C. Eichenwald, W.  
411 E. Truog, M. C. Mammel, R. Steinhorn, R. M. Ryan, S. E. Courtney, H. Horneman, R. A.  
412 Ballard, and Investigators of TOLSURF Pilot and TOLSURF. Inhaled nitric oxide  
413 increases urinary nitric oxide metabolites and cyclic guanosine monophosphate in  
414 premature infants: relationship to pulmonary outcome. *Am J Perinatol* 2015;32:225-232.
- 415 9. Ballard, R. A., R. L. Keller, D. M. Black, P. L. Ballard, J. D. Merrill, E. C. Eichenwald, W.  
416 E. Truog, M. C. Mammel, R. H. Steinhorn, E. E. Rogers, R. M. Ryan, D. J. Durand, J. M.  
417 Asselin, C. M. Bendel, E. M. Bendel-Stenzel, S. E. Courtney, R. Dhanireddy, M. L. Hudak,  
418 F. R. Koch, D. E. Mayock, V. J. McKay, T. M. O'Shea, N. F. Porta, R. Wadhawan, L.  
419 Palermo, and the TOLSURF Study Group. Randomized Trial of Late Surfactant Treatment  
420 in Ventilated Preterm Infants Receiving Inhaled Nitric Oxide. *J Pediatr* 2016;168:23-9.
- 421 10. Ballard, R. A., W. E. Truog, A. Cnaan, R. J. Martin, P. L. Ballard, J. D. Merrill, M. C.  
422 Walsh, D. J. Durand, D. E. Mayock, E. C. Eichenwald, D. R. Null, M. L. Hudak, A. R.  
423 Puri, S. G. Golombek, S. E. Courtney, D. L. Stewart, S. E. Welty, R. H. Phibbs, A. M.  
424 Hibbs, X. Luan, S. R. Wadlinger, J. M. Asselin, C. E. Coburn, and the NO CLD Study  
425 Group. Inhaled nitric oxide in preterm infants undergoing mechanical ventilation. *N Engl J*  
426 *Med* 2006;355:343-353.

- 427 11. Baran, Y., B. Pasaniuc, S. Sankararaman, D. G. Torgerson, C. Gignoux, C. Eng, W.  
428 Rodriguez-Cintron, R. Chapela, J. G. Ford, P. C. Avila, J. Rodriguez-Santana, E. G.  
429 Burchard, and E. Halperin. Fast and accurate inference of local ancestry in Latino  
430 populations. *Bioinformatics* 2012;28:1359-1367.
- 431 12. Barrette, A. M., J. K. Roberts, C. Chapin, E. A. Egan, M. R. Segal, J. A. Oses-Prieto, S.  
432 Chand, A. L. Burlingame, and P. L. Ballard. Antiinflammatory Effects of Budesonide in  
433 Human Fetal Lung. *Am J Respir Cell Mol Biol* 2016;55:623-632.
- 434 13. Bazacliu, C. and R.M. Ryan. Bronchopulmonary Dysplasia. In: *Achieving Respiratory*  
435 *Health Equality: A United States Perspective (Respiratory Medicine)*, edited by Celedon, J.  
436 Humana Press, 2017, 87-96.
- 437 14. Bhandari, V., M. J. Bizzarro, A. Shetty, X. Zhong, G. P. Page, H. Zhang, L. R. Ment, J. R.  
438 Gruen, and the Neonatal Genetics Study Group. Familial and genetic susceptibility to  
439 major neonatal morbidities in preterm twins. *Pediatrics* 2006;117:1901-1906.
- 440 15. Bhattacharya, S., D. Go, D. L. Krenitsky, H. L. Huyck, S. K. Solleti, V. A. Lunger, L.  
441 Metlay, S. Srisuma, S. E. Wert, T. J. Mariani, and G. S. Pryhuber. Genome-wide  
442 transcriptional profiling reveals connective tissue mast cell accumulation in  
443 bronchopulmonary dysplasia. *Am J Respir Crit Care Med* 2012;186:349-358.
- 444 16. Boroumand, M., S. Ziaee, N. Zarghami, M. S. Anvari, S. Cheraghi, S. H. Abbasi, A. Jalali,  
445 and L. Pourgholi. The Kalirin Gene rs9289231 Polymorphism as a Novel Predisposing  
446 Marker for Coronary Artery Disease. *Lab Med* 2014;45:302-308.
- 447 17. Bragg, A. D., H. L. Moses, and R. Serra. Signaling to the epithelium is not sufficient to  
448 mediate all of the effects of transforming growth factor beta and bone morphogenetic  
449 protein 4 on murine embryonic lung development. *Mech Dev* 2001;109:13-26.

- 450 18. Carrera, P., C. Di Resta, C. Volonteri, E. Castiglioni, S. Bonfiglio, D. Lazarevic, D. Cittaro,  
451 E. Stupka, M. Ferrari, M. Somaschini, and the BPD and Genetics Study Group. Exome  
452 sequencing and pathway analysis for identification of genetic variability relevant for  
453 bronchopulmonary dysplasia (BPD) in preterm newborns: A pilot study. *Clin Chim Acta*  
454 2015;451:39-45.
- 455 19. Coalson, J. J. Pathology of new bronchopulmonary dysplasia. *Semin Neonatol* 2003;8:73-  
456 81.
- 457 20. Cole, F. S., C. Alleyne, J. D. Barks, R. J. Boyle, J. L. Carroll, D. Dokken, W. H. Edwards,  
458 M. Georgieff, K. Gregory, M. V. Johnston, M. Kramer, C. Mitchell, J. Neu, D. M. Pursley,  
459 W. M. Robinson, and D. H. Rowitch. NIH Consensus Development Conference statement:  
460 inhaled nitric-oxide therapy for premature infants. *Pediatrics* 2011;127:363-369.
- 461 21. Damy, T., P. F. Lesault, S. Guendouz, S. Eddahibi, L. Tu, E. Marcos, A. Guellich, J. L.  
462 Dubois-Randé, E. Teiger, L. Hittinger, and S. Adnot. Pulmonary hemodynamic responses  
463 to inhaled NO in chronic heart failure depend on PDE5 G(-1142)T polymorphism. *Pulm*  
464 *Circ* 2011;1:377-382.
- 465 22. Drysdale, S. B., M. Prendergast, M. Alcazar, T. Wilson, M. Smith, M. Zuckerman, S.  
466 Broughton, G. F. Rafferty, S. L. Johnston, H. M. Hodemaekers, R. Janssen, L. Bont, and A.  
467 Greenough. Genetic predisposition of RSV infection-related respiratory morbidity in  
468 preterm infants. *Eur J Pediatr* 2014;173:905-912.
- 469 23. Eblaghie, M. C., M. Reedy, T. Oliver, Y. Mishina, and B. L. Hogan. Evidence that  
470 autocrine signaling through *Bmpr1a* regulates the proliferation, survival and morphogenetic  
471 behavior of distal lung epithelial cells. *Dev Biol* 2006;291:67-82.
- 472 24. Ehrenkranz, R. A., M. C. Walsh, B. R. Vohr, A. H. Jobe, L. L. Wright, A. A. Fanaroff, L.

- 473 A. Wrage, K. Poole, and the National Institutes of Child Health and Human Development  
474 Neonatal Research Network. Validation of the National Institutes of Health consensus  
475 definition of bronchopulmonary dysplasia. *Pediatrics* 2005;116:1353-1360.
- 476 25. Gelernter, J., H. R. Kranzler, R. Sherva, L. Almasy, A. I. Herman, R. Koesterer, H. Zhao,  
477 and L. A. Farrer. Genome-wide association study of nicotine dependence in American  
478 populations: identification of novel risk loci in both African-Americans and European-  
479 Americans. *Biol Psychiatry* 2015;77:493-503.
- 480 26. Gien, J., and J. P. Kinsella. Pathogenesis and treatment of bronchopulmonary dysplasia.  
481 *Curr Opin Pediatr* 2011;23:305-313.
- 482 27. Goumans, M. J., A. Zwijsen, P. Ten Dijke, and S. Bailly. Bone Morphogenetic Proteins in  
483 Vascular Homeostasis and Disease. *Cold Spring Harb Perspect Biol* 2017
- 484 28. Greenough, A., and N. Ahmed. Perinatal prevention of bronchopulmonary dysplasia. *J*  
485 *Perinat Med* 2013;41:119-126.
- 486 29. Hadchouel, A., X. Durrmeyer, E. Bouzigon, R. Incitti, J. Huusko, P. H. Jarreau, R.  
487 Lenclen, F. Demenais, M. L. Franco-Montoya, I. Layouni, J. Patkai, J. Bourbon, M.  
488 Hallman, C. Danan, and C. Delacourt. Identification of SPOCK2 as a susceptibility gene  
489 for bronchopulmonary dysplasia. *Am J Respir Crit Care Med* 2011;184:1164-1170.
- 490 30. Howard, T. D., W. H. Giles, J. Xu, M. A. Wozniak, A. M. Malarcher, L. A. Lange, R. F.  
491 Macko, M. J. Basehore, D. A. Meyers, J. W. Cole, and S. J. Kittner. Promoter  
492 polymorphisms in the nitric oxide synthase 3 gene are associated with ischemic stroke  
493 susceptibility in young black women. *Stroke* 2005;36:1848-1851.
- 494 31. <http://www.ingenuity.com/products/ipa>.
- 495 32. <https://imputationserver.sph.umich.edu/index.html#!pages/home>.

- 496 33. Husain, A. N., N. H. Siddiqui, and J. T. Stocker. Pathology of arrested acinar development  
497 in postsurfactant bronchopulmonary dysplasia. *Hum Pathol* 1998;29:710-717.
- 498 34. Ishizawar, D., and C. Yancy. Racial differences in heart failure therapeutics. *Heart Fail*  
499 *Clin* 2010;6:65-74.
- 500 35. Jobe, A. H., and E. Bancalari. Bronchopulmonary dysplasia. *Am J Respir Crit Care Med*  
501 2001;163:1723-1729.
- 502 36. Kalinowski, L., I. T. Dobrucki, and T. Malinski. Race-specific differences in endothelial  
503 function: predisposition of African Americans to vascular diseases. *Circulation*  
504 2004;109:2511-2517.
- 505 37. Khan, B. V., S. T. Rahman, T. Haque, N. Merchant, S. Bhaheetharan, J. Harris, K. Umar, J.  
506 Wahi, and K. C. Ferdinand. Vascular effects of nebivolol added to hydrochlorothiazide in  
507 African Americans with hypertension and echocardiographic evidence of diastolic  
508 dysfunction: the NASAA study. *J Cardiovasc Pharmacol Ther* 2012;17:291-297.
- 509 38. Laughon, M. M., J. C. Langer, C. L. Bose, P. B. Smith, N. Ambalavanan, K. A. Kennedy,  
510 B. J. Stoll, S. Buchter, A. R. Lupton, R. A. Ehrenkranz, C. M. Cotten, D. E. Wilson-  
511 Costello, S. Shankaran, K. P. Van Meurs, A. S. Davis, M. G. Gantz, N. N. Finer, B. A.  
512 Yoder, R. G. Faix, W. A. Carlo, K. R. Schibler, N. S. Newman, W. Rich, A. Das, R. D.  
513 Higgins, M. C. Walsh, and the Eunice Kennedy Shriver National Institute of Child Health  
514 and Human Development Neonatal Research Network. Prediction of bronchopulmonary  
515 dysplasia by postnatal age in extremely premature infants. *Am J Respir Crit Care Med*  
516 2011;183:1715-1722.
- 517 39. Lavoie, P. M., C. Pham, and K. L. Jang. Heritability of bronchopulmonary dysplasia,  
518 defined according to the consensus statement of the national institutes of health. *Pediatrics*



- 519 2008;122:479-485.
- 520 40. Li, J., K. H. Yu, J. Oehlert, L. L. Jeliffe-Pawlowski, J. B. Gould, D. K. Stevenson, M.  
521 Snyder, G. M. Shaw, and H. M. O’Brodivich. Exome Sequencing of Neonatal Blood Spots  
522 and the Identification of Genes Implicated in Bronchopulmonary Dysplasia. *Am J Respir*  
523 *Crit Care Med* 2015;192:589-596.
- 524 41. Liu, J., L. Wang, Y. Liu, Z. Wang, M. Li, B. Zhang, H. Wang, K. Liu, and S. Wen. The  
525 association between endothelial nitric oxide synthase gene G894T polymorphism and  
526 hypertension in Han Chinese: a case-control study and an updated meta-analysis. *Ann Hum*  
527 *Biol* 2015;42:184-194.
- 528 42. Liu, J. Z., A. F. McRae, D. R. Nyholt, S. E. Medland, N. R. Wray, K. M. Brown, I. AMFS,  
529 N. K. Hayward, G. W. Montgomery, P. M. Visscher, N. G. Martin, and S. Macgregor. A  
530 versatile gene-based test for genome-wide association studies. *Am J Hum Genet*  
531 2010;87:139-145.
- 532 43. Luzina, I. G., N. Tsybalyuk, J. Choi, J. D. Hasday, and S. P. Atamas. CCL18-stimulated  
533 upregulation of collagen production in lung fibroblasts requires Sp1 signaling and basal  
534 Smad3 activity. *J Cell Physiol* 2006;206:221-228.
- 535 44. Mason, R. P., L. Kalinowski, R. F. Jacob, A. M. Jacoby, and T. Malinski. Nebivolol  
536 reduces nitroxidative stress and restores nitric oxide bioavailability in endothelium of black  
537 Americans. *Circulation* 2005;112:3795-3801.
- 538 45. McLean, C. Y., D. Bristor, M. Hiller, S. L. Clarke, B. T. Schaar, C. B. Lowe, A. M.  
539 Wenger, and G. Bejerano. GREAT improves functional interpretation of cis-regulatory  
540 regions. *Nat Biotechnol* 2010;28:495-501.
- 541 46. Mi, H., S. Poudel, A. Muruganujan, J. T. Casagrande, and P. D. Thomas. PANTHER

- 542 version 10: expanded protein families and functions, and analysis tools. *Nucleic Acids Res*  
543 2016;44:D336-42.
- 544 47. Natarajan, G., A. Pappas, S. Shankaran, D. E. Kendrick, A. Das, R. D. Higgins, A. R.  
545 Laptook, E. F. Bell, B. J. Stoll, N. Newman, E. C. Hale, R. Bara, and M. C. Walsh.  
546 Outcomes of extremely low birth weight infants with bronchopulmonary dysplasia: impact  
547 of the physiologic definition. *Early Hum Dev* 2012;88:509-515.
- 548 48. Nolan, K., and T. B. Thompson. The DAN family: modulators of TGF- $\beta$  signaling and  
549 beyond. *Protein Sci* 2014;23:999-1012.
- 550 49. Park, K. W., J. J. Park, J. Kang, K. H. Jeon, S. H. Kang, J. K. Han, S. E. Lee, H. M. Yang,  
551 H. Y. Lee, H. J. Kang, B. K. Koo, B. H. Oh, Y. B. Park, and H. S. Kim. Paraoxonase 1  
552 gene polymorphism does not affect clopidogrel response variability but is associated with  
553 clinical outcome after PCI. *PLoS One* 2013;8:e52779.
- 554 50. Posencheg, M. A., A. J. Gow, W. E. Truog, R. A. Ballard, A. Cnaan, S. G. Golombek, P. L.  
555 Ballard, and the NO CLD Investigators. Inhaled nitric oxide in premature infants: effect on  
556 tracheal aspirate and plasma nitric oxide metabolites. *J Perinatol* 2010;30:275-280.
- 557 51. Prasse, A., D. V. Pechkovsky, G. B. Toews, W. Jungraithmayr, F. Kollert, T. Goldmann, E.  
558 Vollmer, J. Müller-Quernheim, and G. Zissel. A vicious circle of alveolar macrophages and  
559 fibroblasts perpetuates pulmonary fibrosis via CCL18. *Am J Respir Crit Care Med*  
560 2006;173:781-792.
- 561 52. Pryhuber, G. S., N. L. Maitre, R. A. Ballard, D. Cifelli, S. D. Davis, J. H. Ellenberg, J. M.  
562 Greenberg, J. Kemp, T. J. Mariani, H. Panitch, C. Ren, P. Shaw, L. M. Taussig, A.  
563 Hamvas, and the Prematurity, and Respiratory Outcomes Program Investigators.  
564 Prematurity and respiratory outcomes program (PROP): study protocol of a prospective

- 565 multicenter study of respiratory outcomes of preterm infants in the United States. *BMC*  
566 *Pediatr* 2015;15:37.
- 567 53. Purcell, S., B. Neale, K. Todd-Brown, L. Thomas, M. A. Ferreira, D. Bender, J. Maller, P.  
568 Sklar, P. I. de Bakker, M. J. Daly, and P. C. Sham. PLINK: a tool set for whole-genome  
569 association and population-based linkage analyses. *Am J Hum Genet* 2007;81:559-575.
- 570 54. Rai, H., F. Parveen, S. Kumar, A. Kapoor, and N. Sinha. Association of endothelial nitric  
571 oxide synthase gene polymorphisms with coronary artery disease: an updated meta-analysis  
572 and systematic review. *PLoS One* 2014;9:e113363.
- 573 55. Ramos, P. S., J. C. Oates, D. L. Kamen, A. H. Williams, P. M. Gaffney, J. A. Kelly, K. M.  
574 Kaufman, R. P. Kimberly, T. B. Niewold, C. O. Jacob, B. P. Tsao, G. S. Alarcón, E. E.  
575 Brown, J. C. Edberg, M. A. Petri, R. Ramsey-Goldman, J. D. Reveille, L. M. Vilá, J. A.  
576 James, J. M. Guthridge, J. T. Merrill, S. A. Boackle, B. I. Freedman, R. H. Scofield, A. M.  
577 Stevens, T. J. Vyse, L. A. Criswell, K. L. Moser, M. E. Alarcón-Riquelme, C. D.  
578 Langefeld, J. B. Harley, and G. S. Gilkeson. Variable association of reactive intermediate  
579 genes with systemic lupus erythematosus in populations with different African ancestry. *J*  
580 *Rheumatol* 2013;40:842-849.
- 581 56. Subramanian, A., P. Tamayo, V. K. Mootha, S. Mukherjee, B. L. Ebert, M. A. Gillette, A.  
582 Paulovich, S. L. Pomeroy, T. R. Golub, E. S. Lander, and J. P. Mesirov. Gene set  
583 enrichment analysis: a knowledge-based approach for interpreting genome-wide expression  
584 profiles. *Proc Natl Acad Sci U S A* 2005;102:15545-15550.
- 585 57. Trovoada, M. J., M. Martins, R. Ben Mansour, M. R. Sambo, A. B. Fernandes, L. Antunes  
586 Gonçalves, A. Borja, R. Moya, P. Almeida, J. Costa, I. Marques, M. P. Macedo, A.  
587 Coutinho, D. L. Narum, and C. Penha-Gonçalves. NOS2 variants reveal a dual genetic

- 588 control of nitric oxide levels, susceptibility to Plasmodium infection, and cerebral malaria.  
589 Infect Immun 2014;82:1287-1295.
- 590 58. van der Valk, R. J., L. Duijts, N. J. Timpson, M. T. Salam, M. Standl, J. A. Curtin, J.  
591 Genuneit, M. Kerhof, E. Kreiner-Møller, A. Cáceres, A. Gref, L. L. Liang, H. R. Taal, E.  
592 Bouzigon, F. Demenais, R. Nadif, C. Ober, E. E. Thompson, K. Estrada, A. Hofman, A. G.  
593 Uitterlinden, C. van Duijn, F. Rivadeneira, X. Li, S. P. Eckel, K. Berhane, W. J.  
594 Gauderman, R. Granell, D. M. Evans, B. St Pourcain, W. McArdle, J. P. Kemp, G. D.  
595 Smith, C. M. Tiesler, C. Flexeder, A. Simpson, C. S. Murray, O. Fuchs, D. S. Postma, K.  
596 Bønnelykke, M. Torrent, M. Andersson, P. Sleiman, H. Hakonarson, W. O. Cookson, M. F.  
597 Moffatt, L. Paternoster, E. Melén, J. Sunyer, H. Bisgaard, G. H. Koppelman, M. Ege, A.  
598 Custovic, J. Heinrich, F. D. Gilliland, A. J. Henderson, V. W. Jaddoe, J. C. de Jongste, and  
599 the EARly Genetics & Lifecourse Epidemiology (EAGLE) Consortium. Fraction of exhaled  
600 nitric oxide values in childhood are associated with 17q11.2-q12 and 17q12-q21 variants. J  
601 Allergy Clin Immunol 2014;134:46-55.
- 602 59. Velez, D. R., W. F. Hulme, J. L. Myers, J. B. Weinberg, M. C. Levesque, M. E. Stryjewski,  
603 E. Abbate, R. Estevan, S. G. Patillo, J. R. Gilbert, C. D. Hamilton, and W. K. Scott.  
604 NOS2A, TLR4, and IFNGR1 interactions influence pulmonary tuberculosis susceptibility  
605 in African-Americans. Hum Genet 2009;126:643-653.
- 606 60. Wai, K. C., M. A. Kohn, R. A. Ballard, W. E. Truog, D. M. Black, J. M. Asselin, P. L.  
607 Ballard, E. E. Rogers, R. L. Keller, and the Trial of Late Surfactant (TOLSURF) Study  
608 Group. Early Cumulative Supplemental Oxygen Predicts Bronchopulmonary Dysplasia in  
609 High Risk Extremely Low Gestational Age Newborns. J Pediatr 2016;177:97-102.e2.
- 610 61. Wang, H., K. R. St Julien, D. K. Stevenson, T. J. Hoffmann, J. S. Witte, L. C. Lazzeroni,

- 611 M. A. Krasnow, C. C. Quaintance, J. W. Oehlert, L. L. Jelliffe-Pawlowski, J. B. Gould, G.  
612 M. Shaw, and H. M. O’Broovich. A genome-wide association study (GWAS) for  
613 bronchopulmonary dysplasia. *Pediatrics* 2013;132:290-297.
- 614 62. Warburton, D., and S. Bellusci. The molecular genetics of lung morphogenesis and injury  
615 repair. *Paediatr Respir Rev* 2004;5 Suppl A:S283-7.
- 616 63. Wilkins, M. R., A. A. Aldashev, J. Wharton, C. J. Rhodes, J. Vandrovцова, D.  
617 Kasperaviciute, S. G. Bhosle, M. Mueller, S. Geschka, S. Rison, B. Kojonazarov, N. W.  
618 Morrell, I. Neidhardt, N. B. Surmeli, N. B. Surmeli, T. J. Aitman, J. P. Stasch, S. Behrends,  
619 and M. A. Marletta.  $\alpha$ 1-A680T variant in GUCY1A3 as a candidate conferring protection  
620 from pulmonary hypertension among Kyrgyz highlanders. *Circ Cardiovasc Genet*  
621 2014;7:920-929.
- 622 64. Willer, C. J., Y. Li, and G. R. Abecasis. METAL: fast and efficient meta-analysis of  
623 genomewide association scans. *Bioinformatics* 2010;26:2190-2191.
- 624 65. Wu, Y., Z. Zhu, X. Fang, L. Yin, Y. Liu, S. Xu, and A. Li. The Association between NOS3  
625 Gene Polymorphisms and Hypoxic-Ischemic Encephalopathy Susceptibility and Symptoms  
626 in Chinese Han Population. *Biomed Res Int* 2016;2016:1957374.
- 627 66. Zhang, Y., and N. Kaminski. Biomarkers in idiopathic pulmonary fibrosis. *Curr Opin Pulm*  
628 *Med* 2012;18:441-446.
- 629 67. Zhao, G. L., Q. J. Li, and H. Y. Lu. Association between NOS3 genetic variants and  
630 coronary artery disease in the Han population. *Genet Mol Res* 2016;15

631

632

**Table 1.**

Baseline characteristics of participants from the TOLSURF study included in the GWAS. P-values represent comparisons using a student's t-test for continuous measurements (gestational age, birth weight, and RSS at entry), and a chi-square test for categorical (% male, % multiple gestation). Demographics are shown by maternal self-reported racial/ethnic group; data are mean plus standard deviation in parentheses. RSS=respiratory severity score.

|                            | Non-Hispanic White: |               |         | African American: |               |         | Hispanic White: |                |         |
|----------------------------|---------------------|---------------|---------|-------------------|---------------|---------|-----------------|----------------|---------|
|                            | BPD/<br>Death       | No BPD        | p-value | BPD/<br>Death     | No BPD        | p-value | BPD/<br>Death   | No BPD         | p-value |
| N                          | 136                 | 41            | n/a     | 82                | 51            | n/a     | 28              | 14             | n/a     |
| Gestational<br>Age (weeks) | 25.4<br>(1.3)       | 25.2<br>(1.2) | 0.52    | 24.9<br>(1.0)     | 25.4<br>(1.0) | 0.008   | 24.9<br>(1.3)   | 25.5<br>(0.95) | 0.12    |
| Birth Weight<br>(g)        | 712<br>(182)        | 750<br>(165)  | 0.21    | 640<br>(147)      | 704<br>(145)  | 0.015   | 703<br>(155)    | 740<br>(210)   | 0.57    |
| % Male                     | 59.6                | 51.2          | 0.44    | 56.1              | 45.1          | 0.29    | 57.1            | 35.7           | 0.33    |
| % Multiple<br>Gestation    | 15.4                | 22.0          | 0.46    | 9.76              | 9.80          | 1.0     | 3.57            | 14.3           | 0.53    |
| RSS at Entry               | 4.0<br>(2.1)        | 3.1<br>(1.4)  | 0.0008  | 4.0<br>(2.2)      | 2.7<br>(0.94) | <0.0001 | 3.8<br>(2.8)    | 3.3<br>(2.0)   | 0.49    |

**Table 2.**

Results of tests of association at rs372271081 for survival without BPD using logistic regression, and urinary NO metabolites following iNO treatment using linear regression. Results are shown with respect to the minor allele (A), which trends as protective for BPD in three populations, and is significantly associated with lower urinary NO metabolites in infants of maternal non-Hispanic White race/ethnicity. Beta=regression coefficient/effect size, SE=standard error, CI=confidence interval.

| Population         | Survival without BPD:  |                           |            |                      | Urinary NO metabolites: |            |              |                      |
|--------------------|------------------------|---------------------------|------------|----------------------|-------------------------|------------|--------------|----------------------|
|                    | Frequency in Cases (N) | Frequency in Controls (N) | Odds Ratio | P-value              | N                       | Beta (SE)  | 95% CI       | P-value              |
| Non-Hispanic White | 0.040 (136)            | 0.12 (41)                 | 0.30       | $6.2 \times 10^{-3}$ | 26                      | -5.3 (1.7) | (-8.7, -1.9) | $6.2 \times 10^{-3}$ |
| African American   | 0.055 (82)             | 0.19 (51)                 | 0.25       | $6.9 \times 10^{-4}$ | 23                      | 0.74 (2.3) | (-3.8, 5.2)  | 0.75                 |
| Hispanic White     | 0.018 (28)             | 0.11 (14)                 | 0.15       | 0.070                | 13                      | -1.9 (2.3) | (-6.5, 2.7)  | 0.45                 |

**Table 3.**

Genetic variants associated with survival without BPD at  $p < 10^{-6}$  in a meta-analysis across three racial/ethnic groups. For loci with multiple SNPs at  $p < 10^{-6}$  only a single SNP with the smallest p-value is included in the table. OR=odds ratio, NHW=non-Hispanic White (136 BPD/death infants, 41 no BPD), AA=African American (82 BPD/death infants, 51 no BPD), HW = Hispanic White (28 BPD/death infants, 14 no BPD), Meta=meta-analysis (total 246 BPD/death infants, 106 no BPD).

| Chr | Position (hg19) | SNP          | Allele | Annotation               | NHW OR | AA OR | HW OR | Meta OR | Meta p-value          |
|-----|-----------------|--------------|--------|--------------------------|--------|-------|-------|---------|-----------------------|
| 1   | 19974397        | rs372271081  | A      | intron, <i>NBL1</i>      | 0.19   | 0.10  | 0.17  | 0.17    | $7.42 \times 10^{-7}$ |
| 2   | 14648908        | rs10193074   | G      | intergenic               | 0.26   | 0.25  | NA    | 0.26    | $4.17 \times 10^{-6}$ |
| 2   | 33777089        | 2:33777089   | C      | intron, <i>RASGRP3</i>   | 0.39   | 0.17  | 0.22  | 0.28    | $6.41 \times 10^{-6}$ |
| 2   | 54980799        | 2:54980799   | G      | intron, <i>EML6</i>      | 0.33   | 0.78  | 0.44  | 0.40    | $5.20 \times 10^{-6}$ |
| 2   | 105035900       | rs4851694    | T      | intergenic               | 3.8    | 8.7   | NA    | 4.3     | $5.92 \times 10^{-6}$ |
| 2   | 105039687       | rs2889323    | C      | intergenic               | 3.8    | 8.7   | NA    | 4.3     | $5.92 \times 10^{-6}$ |
| 2   | 105091271       | rs6543256    | G      | intron, <i>LOC150568</i> | 3.2    | 9.0   | NA    | 4.1     | $7.24 \times 10^{-6}$ |
| 3   | 74073182        | rs1949931    | G      | intergenic               | 0.38   | 0.082 | 0.44  | 0.39    | $9.25 \times 10^{-6}$ |
| 10  | 134044152       | rs60417571   | T      | intron, <i>STK32C</i>    | 0.19   | NA    | 0.27  | 0.21    | $3.06 \times 10^{-6}$ |
| 12  | 131048872       | 12:131048872 | CTG    | intron, <i>RIMBP2</i>    | 0.44   | 0.11  | 0.41  | 0.39    | $4.91 \times 10^{-6}$ |
| 14  | 47459909        | rs8016110    | A      | intron, <i>MDGA2</i>     | 2.9    | 43    | 2.5   | 3.5     | $2.92 \times 10^{-6}$ |
| 16  | 8834085         | rs75055007   | A      | intron, <i>ABAT</i>      | 0.30   | 0.061 | 0.28  | 0.26    | $2.79 \times 10^{-6}$ |



**Table 4.**

Top genes associated with survival without BPD in a meta-analysis across racial/ethnic groups including 246 cases and 106 controls. Gene-based statistics were calculated using VEGAS, none of the genes were statistically significant following Bonferroni correction for the total number of genes examined (N=17,671).

| Chr | Gene          | Number of SNPs | p-value              |
|-----|---------------|----------------|----------------------|
| 5   | <i>RICTOR</i> | 17             | $4.5 \times 10^{-5}$ |
| 4   | <i>MED28</i>  | 6              | $1.8 \times 10^{-4}$ |
| 12  | <i>IL23A</i>  | 8              | $2.2 \times 10^{-4}$ |
| 19  | <i>ZNF492</i> | 14             | $2.5 \times 10^{-4}$ |

**Table 5.**

List of NO-related candidate genes/variants previously associated with disease.

| Gene               | Variant                                              | Disease (measurement)                                                                                                                                                                |
|--------------------|------------------------------------------------------|--------------------------------------------------------------------------------------------------------------------------------------------------------------------------------------|
| <i>NOS2</i>        | rs944722<br>---<br>rs2274894, rs7215373<br>rs3794767 | Radiation lung injury (lung function) (58)<br>Infant RSV-related respiratory morbidity (22)<br>Tuberculosis susceptibility (59)<br>Malaria susceptibility (blood plasmodium/NO) (57) |
| <i>NOS3</i>        | rs1799983, rs2070744<br>G894T<br>-922 G>A, -786 T>C  | Coronary artery disease (54, 67)<br>Essential hypertension (41)<br>Hypoxic ischemic encephalopathy (65)<br>Ischemic stroke susceptibility (30)                                       |
| <i>GUCY1A3</i>     | A680T                                                | Pulmonary hypertension (63)                                                                                                                                                          |
| <i>LYRM9</i>       | rs3751972                                            | Asthma (FeNO*) (58)                                                                                                                                                                  |
| <i>GSDMB</i>       | rs8069176                                            | Asthma (FeNO*) (58)                                                                                                                                                                  |
| <i>GSR</i>         | rs2253409                                            | Lupus (NO production) (55)                                                                                                                                                           |
| <i>KALRN</i>       | rs9289231                                            | Coronary artery disease (16)                                                                                                                                                         |
| <i>TSNAX-DISC1</i> | rs821722                                             | Nicotine dependence (25)                                                                                                                                                             |
| <i>PON1</i>        | Q192R                                                | Coronary artery disease (49)                                                                                                                                                         |
| <i>IFNGR1</i>      | rs1327474                                            | Tuberculosis susceptibility (59)                                                                                                                                                     |
| <i>PDE5</i>        | G1142T                                               | Congestive heart failure response to inhaled NO (21)                                                                                                                                 |

\*FeNO, fractional concentration of nitric oxide in exhaled air

**Table 6.**

Panther and MSigDB pathways showing a significant enrichment of genes associated with survival without BPD at  $p < 0.05$ . A foreground set of 1,024 genes with association  $p$ -value  $< 0.05$  was compared to a background set of 17,640 genes using GREAT. Gene-based association  $p$ -values were calculated using VEGAS. FDR=false discovery rate.

| Pathway/Gene Set                                                                                                                                        | P-value               | FDR                   | Fold Enrichment | Number of Genes |
|---------------------------------------------------------------------------------------------------------------------------------------------------------|-----------------------|-----------------------|-----------------|-----------------|
| <b>Panther:</b>                                                                                                                                         |                       |                       |                 |                 |
| Toll receptor signaling pathway                                                                                                                         | $2.3 \times 10^{-4}$  | 0.035                 | 3.1             | 13              |
| <b>MSigDb:</b>                                                                                                                                          |                       |                       |                 |                 |
| Genes within amplicon 1q21 identified in a copy number alterations study of 191 breast tumor samples                                                    | $1.5 \times 10^{-15}$ | $5.1 \times 10^{-12}$ | 8.6             | 21              |
| Genes with low-CpG-density promoters bearing H3K4me3 marks in embryonic fibroblasts                                                                     | $4.1 \times 10^{-7}$  | $6.8 \times 10^{-4}$  | 2.5             | 35              |
| Nearest neighbors of TAL1, based on the close agreement of their expression profiles with that of TAL1 in pediatric T cell acute lymphoblastic leukemia | $6.7 \times 10^{-6}$  | 0.0076                | 5.0             | 11              |
| Genes up-regulated in lung tissue upon LPS aspiration with mechanical ventilation                                                                       | $2.4 \times 10^{-5}$  | 0.020                 | 2.2             | 32              |

**Table 7.**

Canonical pathways from Ingenuity Pathway Analysis (IPA) with a significant enrichment of genes with association  $p < 0.01$  for survival without BPD. Statistical significance was determined using a Bonferroni adjustment for 209 canonical pathways tested ( $\alpha = 2.39 \times 10^{-4}$ ).

| Canonical Pathway                    | # of Genes (%) | Genes in Pathway with $p < 0.01$                           | P-value               |
|--------------------------------------|----------------|------------------------------------------------------------|-----------------------|
| Agranulocyte adhesion and diapedesis | 9/181 (4.8%)   | CCL3, CCL4, CCL17, CCL18, CCL22, CLDN17, CX3CL1, MYL9, RDX | $3.06 \times 10^{-5}$ |
| Granulocyte adhesion and diapedesis  | 8/181 (4.4%)   | CCL3, CCL4, CCL17, CCL18, CCL22, CLDN17, CX3CL1, RDX       | $1.22 \times 10^{-4}$ |

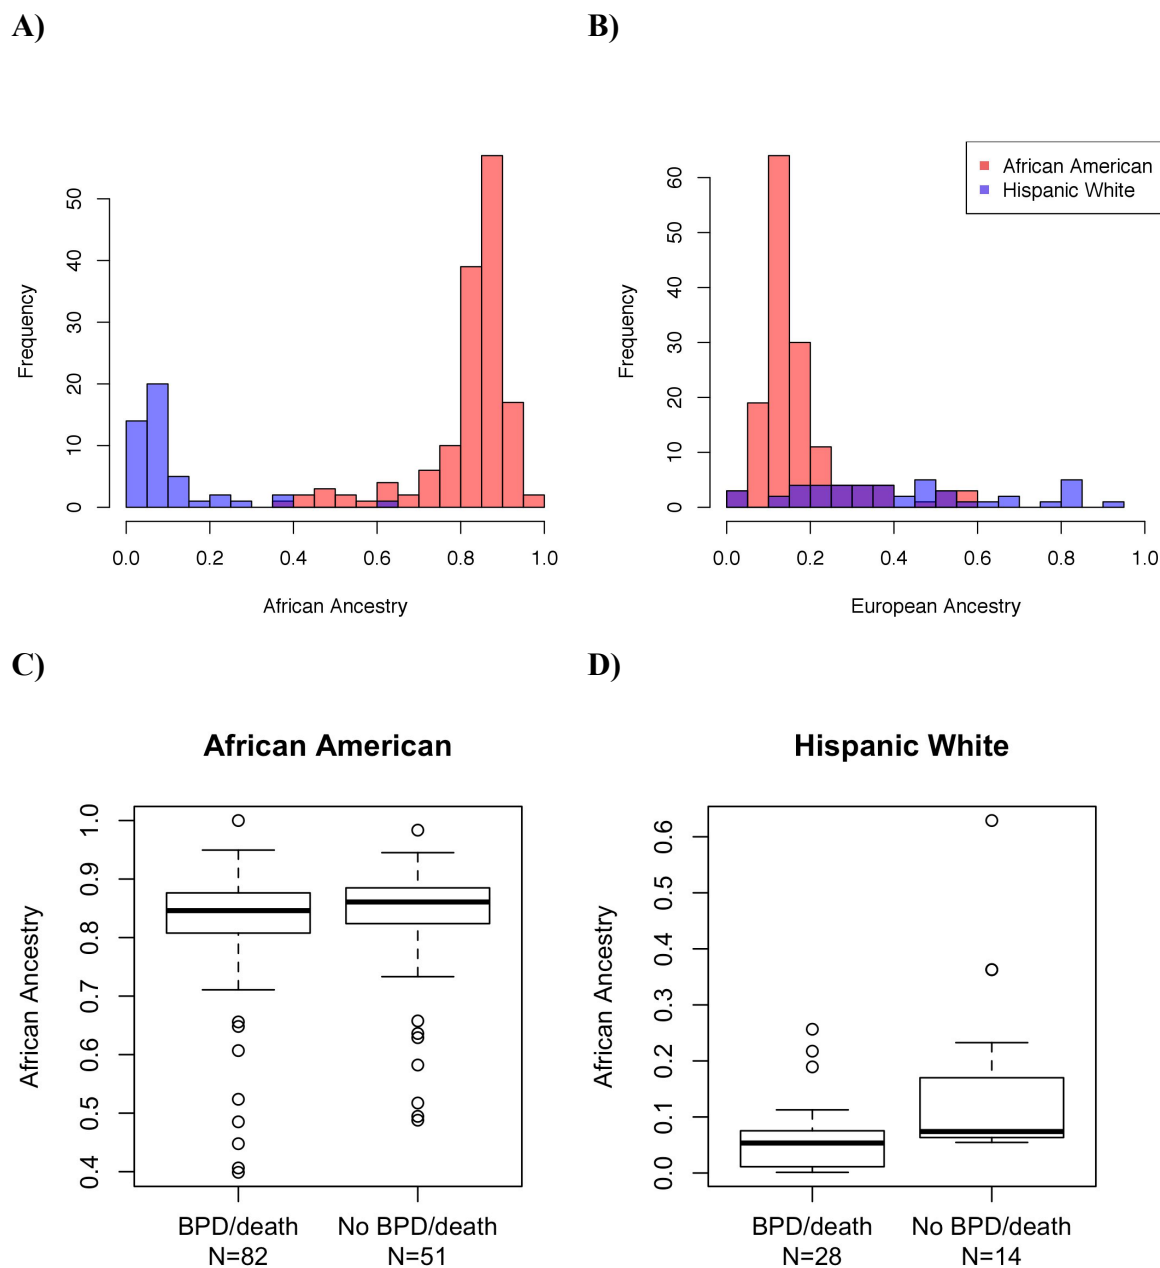

**Fig. 1.**

Global ancestry proportions and survival without BPD. The proportion of global African (A) and European (B) ancestry in preterm infants participating in the TOLSURF study by maternal self-reported race/ethnicity. Global ancestry was inferred using ADMIXTURE. Boxplots comparing global African ancestry and survival without BPD in infants of maternal self-reported Black/African American race/ethnicity (C) (logistic regression:  $p=0.97$ ,  $\beta=-0.015 \pm 0.37$ ), and Hispanic White race/ethnicity (D) ( $p=0.01$ ,  $\beta=-1.5 \pm 0.60$ ).

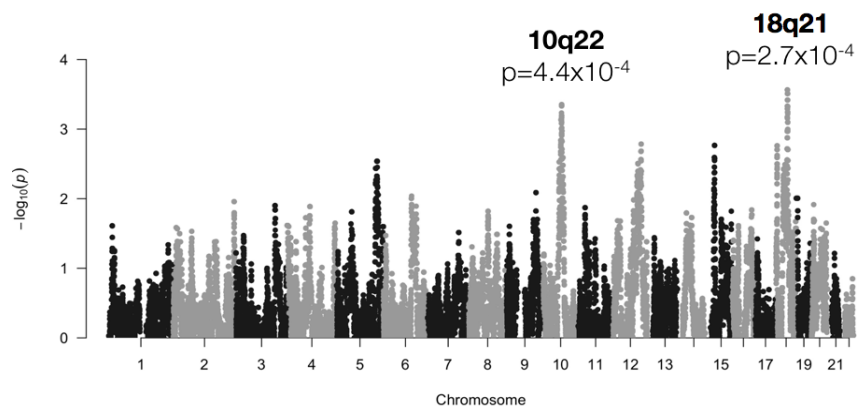

**Fig. 2.**

Results of admixture mapping comparing local African ancestry and survival without BPD in 133 infants with maternal self-reported Black/African American race/ethnicity (82 cases, 51 controls). Top associations were observed at 10q21 (OR=0.17,  $p=4.4 \times 10^{-4}$ ) and 18q21 (OR=4.6,  $p=2.7 \times 10^{-4}$ ).

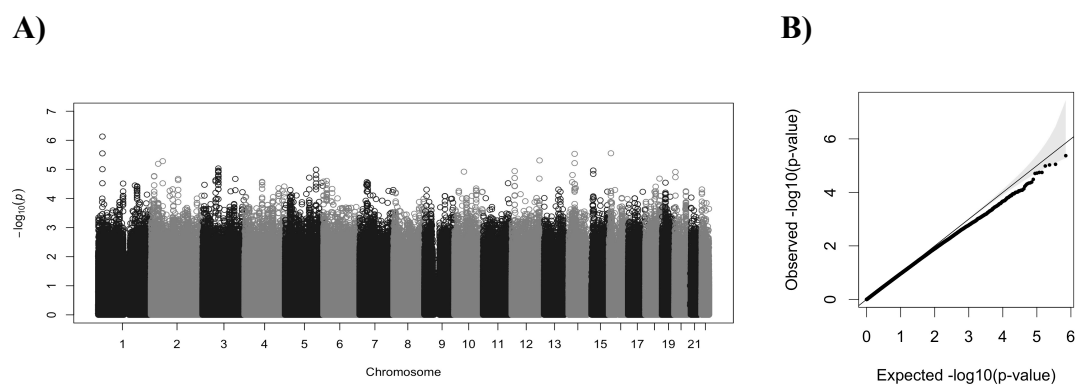

**Fig. 3.**

Manhattan plot (A) and quantile-quantile plot (qq plot, B) showing the results of a weighted meta-analysis for survival without BPD across three maternal self-reported racial/ethnic groups, including Non-Hispanic White (136 BPD/death infants, 41 no BPD), Black/African American (82 BPD/death infants, 51 no BPD), and Hispanic White (28 BPD/death infants, 14 no BPD).

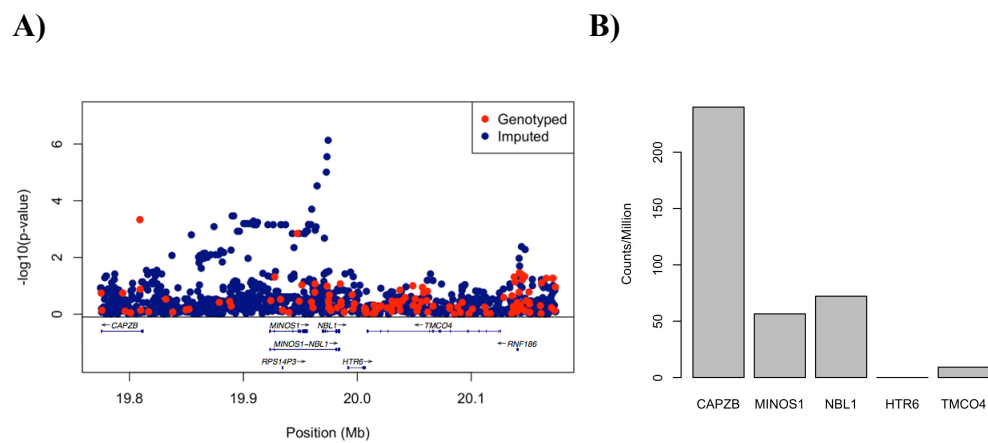

**Fig. 4.**

LocusZoom plot of the region flanking the top association at rs372271081, an intronic variant of *NBL1* (A). Expression of genes by RNAseq within this locus in fetal lung at 23 wk gestation (B).



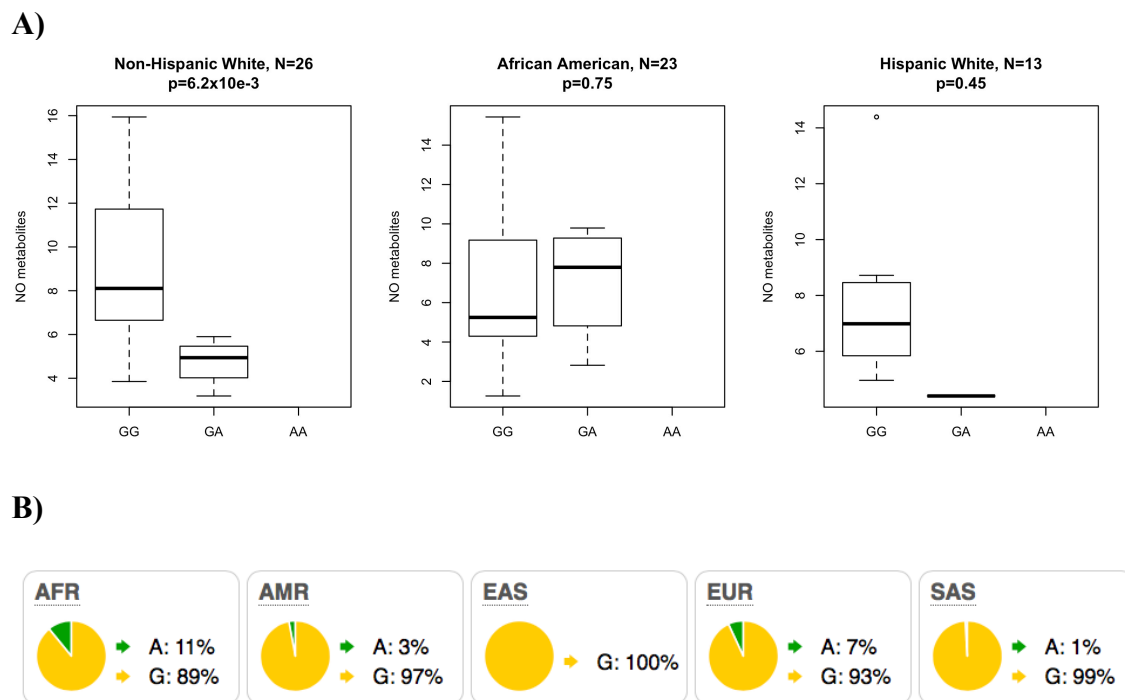

**Fig. 5.**

(A) Boxplot showing levels of urinary NO metabolites by genotype at rs372271081 in preterm infants following treatment with inhaled nitric oxide at 5ppm. (B) Frequency of rs372271081 in populations from the phase 3 1000 Genomes Project. AFR=African, AMR=Admixed American, EAS=East Asian, EUR=European, and SAS=South Asian.

## APPENDIX

### TOLSURF Investigators

Robin H. Steinhorn, Department of Pediatrics, Children's National Medical Center, Washington DC

Catherine M. Bendel, Department of Pediatrics, University of Minnesota, Minneapolis MN

Ellen M. Bendel-Stenzel, Department of Pediatrics, Children's Hospital and Clinics of Minnesota, St. Paul and Minneapolis MN

Sherry E. Courtney, Department of Pediatrics, University of Arkansas for Medical Sciences, Little Rock AR

Ramasubbareddy Dhanireddy, Department of Pediatrics, University of Tennessee Health Science Center, Memphis TN

Frances R. Koch, Department of Pediatrics, Medical University of South Carolina, Charleston SC

Mark L. Hudak, Department of Pediatrics, University of Florida College of Medicine, Jacksonville FL

Dennis E. Mayock, Department of Pediatrics, University of Washington, Seattle WA

Rajan Wadhawan, Department of Pediatrics, Florida Hospital for Children, Orlando FL

Nicolas F. Porta, Department of Pediatrics, Northwestern University Feinberg School of Medicine, Chicago IL

Victor J. McKay, Department of Pediatrics, All Children's Hospital, St. Petersburg FL

Jeffrey D Merrill, Children's Hospital Oakland Research Institute, Oakland CA

Eric C. Eichenwald, Department of Pediatrics, Children's Hospital of Philadelphia, Philadelphia PA

William E. Truog, Department of Pediatrics, Children's Mercy Hospital, Kansas City MO

Mark C. Mammel, Children's Hospital and Clinics of Minnesota, St. Paul MN

Elizabeth E. Rogers, Department of Pediatrics, University of California San Francisco, San Francisco CA

Rita M. Ryan, Department of Pediatrics, Medical University of South Carolina, Charleston SC

David J. Durand, Children's Hospital Oakland Research Institute, Oakland CA

T. Michael O'Shea, Department of Pediatrics, Wake Forest School of Medicine Winston-Salem NC

Dennis M. Black, Department of Epidemiology and Biostatistics, University of California San Francisco, San Francisco CA

In addition to the authors and other TOLSURF investigators, the following members of the TOLSURF Study Group participated in this study:

University of California, San Francisco, San Francisco, CA:

Suzanne Hamilton Strong, RN, Jill Immamura-Ching, RN, Margaret Orfanos-Villalobos, RN, Cassandra Williams, RN; Lisa Palermo MA

Alta Bates Summit Medical Center, Berkeley, CA, and UCSF Benioff Children's Hospital Oakland, Oakland, CA: Dolia Horton, RRT, Loretta Pacello, RCP, April Willard, RN;

Children's Mercy Hospital, Kansas City, MO:

Cheryl Gauldin, RN, Anne Holmes, RN, Patrice Johnson, RRT, Kerrie Meinert, RRT;

Women and Children's Hospital of Buffalo, Buffalo, NY: Anne Marie Reynolds, MD, Janine Lucie, NNP, Patrick Conway, Michael Sacilowski, Michael Leadersdorff, RRT, Pam Orbank, RRT, Karen Wynn, NNP;

Anne and Robert H. Lurie Children's Hospital/Northwestern University, Chicago, IL:

Maria deUngria, MD, Janine Yasmin Khan, MD, Karin Hamann, RN, Molly Schau, RN, Brad Hopkins, RRT, James Jenson, RRT;

Texas Children's Hospital, Houston, TX: Carmen Garcia, RN

Stony Brook University Hospital, Stony Brook, NY: Aruna Parekh, MD, Jila Shariff, MD, Rose McGovern, RN, Jeff Adelman, RRT, Adrienne Combs, RN, Mary Tjersland, RRT;

University of Washington, Seattle, WA: Elizabeth Howland, Susan Walker, RN, Jim Longoria, RRT, Holly Meo, RRT;

University of Texas Health Science Center, Houston, TX: Amir Khan, MD, Georgia McDavid, RN, Katrina Burson, RN, BSN, Richard Hinojosa, BSRT, RRT, Christopher Johnson, MBA, RRT, Karen Martin, RN, BSN, Sarah Martin, RN, BSN, Shawna Rogers, RN, BSN, Sharon Wright, MT;

University of Florida College of Medicine, Jacksonville, UF Health Shands Hospital, and Wolfson Children's Hospital, Jacksonville, FL: Kimberly Barnette, RRT, Amanda Kellum, RRT, Michelle Burke, RN, Christie Hayes, RRT, Stephanie Chadwick, RN, Danielle Howard, RN, Carla Kennedy, RRT, Renee Prince, RN;

Wake Forest School of Medicine and Forsyth Medical Center, Winston Salem, NC:

Beatrice Stefanescu, MD, Kelly Warden, RN, Patty Brown, RN, Jennifer Griffin, RRT, Laura Conley, RRT;

University of Minnesota Amplatz Children's Hospital, Minneapolis, MN: Michael Georgieff, MD, Bridget Davern, Marla Mills, RN, Sharon Ritter, RRT;

Medical University of South Carolina, Charleston, SC: Carol Wagner, MD, Deanna Fanning, RN, Jimmy Roberson, RRT;

Children's Hospitals and Clinics of Minnesota, St. Paul, MN: Andrea Lampland, MD, Pat Meyers, RRT, Angela Brey, RRT;

Children's Hospitals and Clinics of Minnesota, Minneapolis, MN: Neil Mulrooney MD, Cathy Worwa, RRT, Pam Dixon, RN, ANM, Gerald Ebert, RRT-NPS, Cathy Hejl, RRT, Molly Maxwell, RT, Kristin McCullough, RN;

University of Tennessee Health Science Center, Memphis, TN: Mohammed T. El Abiad, MD, Ajay Talati, MD, Sheila Dempsey, RN, Kathy Gammage, RRT, MBA, Gayle Gower, RN, Kathy James, RRT, Pam LeNoue, RN;

All Children's Hospital, St. Petersburg, FL: Suzi Bell, DNP, Dawn Bruton, RN, BSN, CCRP, Michelle Beaulieu, DNP, Richard Williams, RRT;

Florida Hospital for Children, Orlando, FL: Robin Barron-Nelson, RN, Shane Taylor, RRT;

Arkansas Children's Hospital and University of Arkansas Medical Sciences, Little Rock, AK: Carol Sikes, RN, Gary Lowe, RRT, Betty Proffitt, RRT.

Clinical Coordinating Center:

University of California San Francisco, Department of Pediatrics: Cheryl Chapin, Hart Horneman, Karin Hamann, RN, Susan Kelley, RRT, Karin Knowles, Nancy Newton, RN, MS.

Data Coordinating Center:

University of California San Francisco, Department of Epidemiology and Biostatistics: Eric Vittinghoff, PhD, Jean Hietpas, Laurie Denton, Lucy Wu.

Data Safety Monitoring Board:

Cincinnati Children's Hospital Medical Center, Cincinnati, OH: Allan Jobe, MD, (Chair 2009-2010); UH Rainbow Babies and Children's Hospital, Cleveland, OH: Avroy Fanaroff, MD (Chair 2010-2016); EMMES Corporation, Rockville, MD: Clemons; Boston University School of Public Health, Boston, MA: Leonard Glantz, JD; Wake Forest School of Medicine, Winston-Salem, NC: David Reboussin, PhD; Stanford University, Stanford, CA: Krisa Van Meurs MD (2009-2010); Johns Hopkins University, Baltimore, MD: Marilee Allen, MD (2010-2016); Women and Infants Hospital, Providence, RI: Betty Vohr, MD.

Clinical Steering Committee:

Department of Pediatrics, UCSF Benioff Children's Hospital San Francisco, San Francisco CA: Roberta Ballard, MD, Philip Ballard, MD, PhD, Roberta Keller, MD, Elizabeth Rogers, MD, Nancy Newton, MS, RN; University of California, San Francisco, Department of Epidemiology and Biostatistics: Dennis Black, PhD; National Heart, Lung and Blood Institute (NIH/NHLBI): Carol Blaisdell, MD; UCSF Benioff Children's Hospital Oakland, Oakland, CA: David Durand, MD, Jeffrey Merrill, MD, Jeanette Asselin, MS, RRT; University of Texas Health Science Center, Houston, TX: Eric Eichenwald, MD; Children's Hospital and Clinics of Minnesota, St. Paul, MN: Mark Mammel, MD; Medical University of South Carolina, Charleston, SC: Rita Ryan, MD; Children's Mercy Hospital, Kansas City, MO: William Truog, MD.
